# Supplementary material for: Linoleate-Enrichment of Mitochondrial Cardiolipin Molecular Species Is Developmentally Regulated and a Determinant of Metabolic Phenotype
Source: MDPI journal article supplement (doi:10.3390/biology12010032), 2022-12-24
Supplement: s1 [file s1]

## Supplementary Materials:

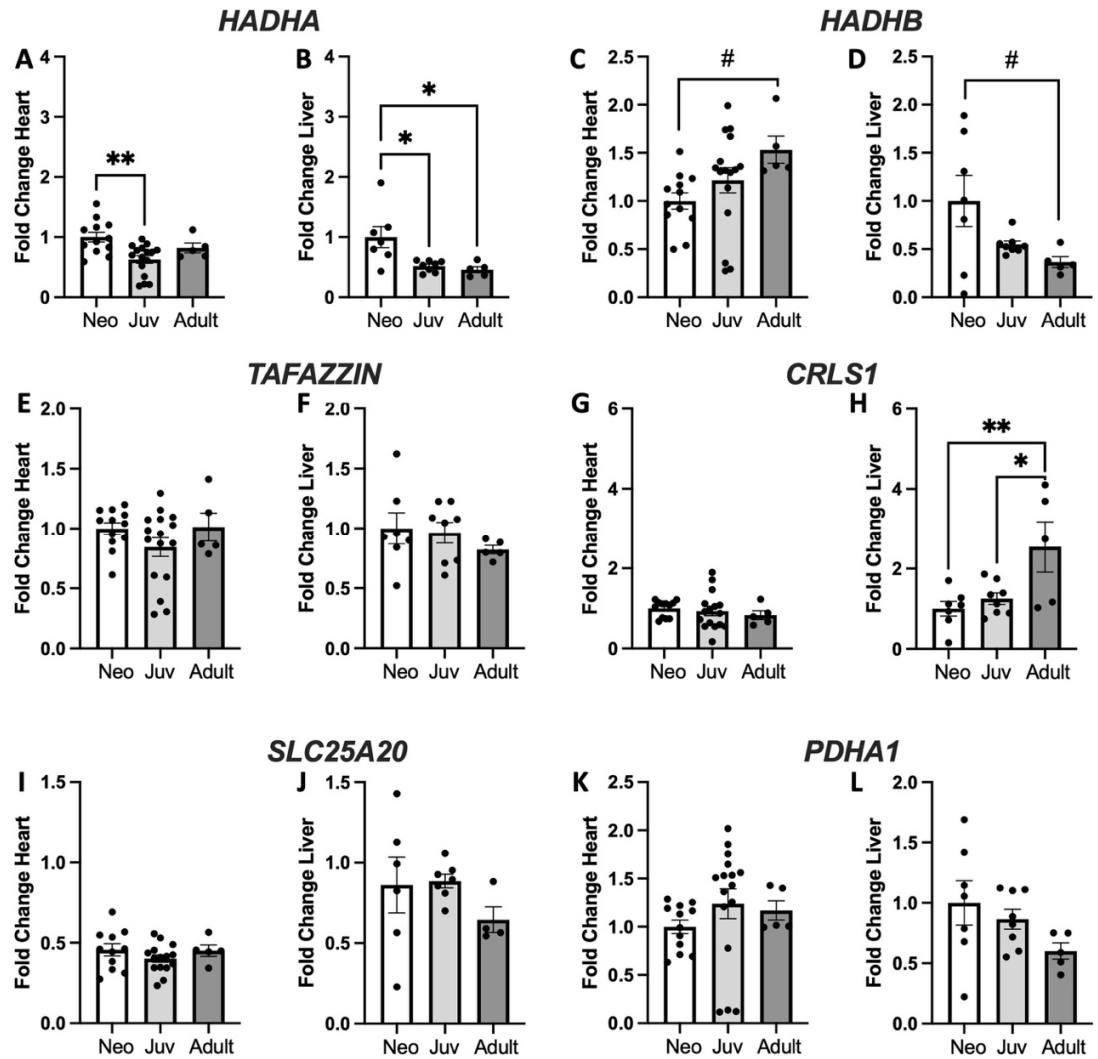

**Figure S1.** Additional genes in heart and liver during early development. Quantitative rtPCR for the heart and liver genes: HADHA, coding for Trifunctional Protein Alpha Subunit (A,B); HADHB, coding for Trifunctional Protein Beta Subunit (C,D); CL remodeling gene TAF1 (E,F); CL biosynthesis gene CRLS1 (Cardiolipin Synthase) (G,H); SLC25A20 coding for Carnitine Acylcarnitine Translocase (I,J); PDHA1 coding for Pyruvate Dehydrogenase E1alpha subunit (K,L) #p<0.1, \*p<0.05, \*\*p<0.01; N=5-16 separate animals; Neo, neonatal; Juv, juvenile. Error bars represent standard error of the mean.

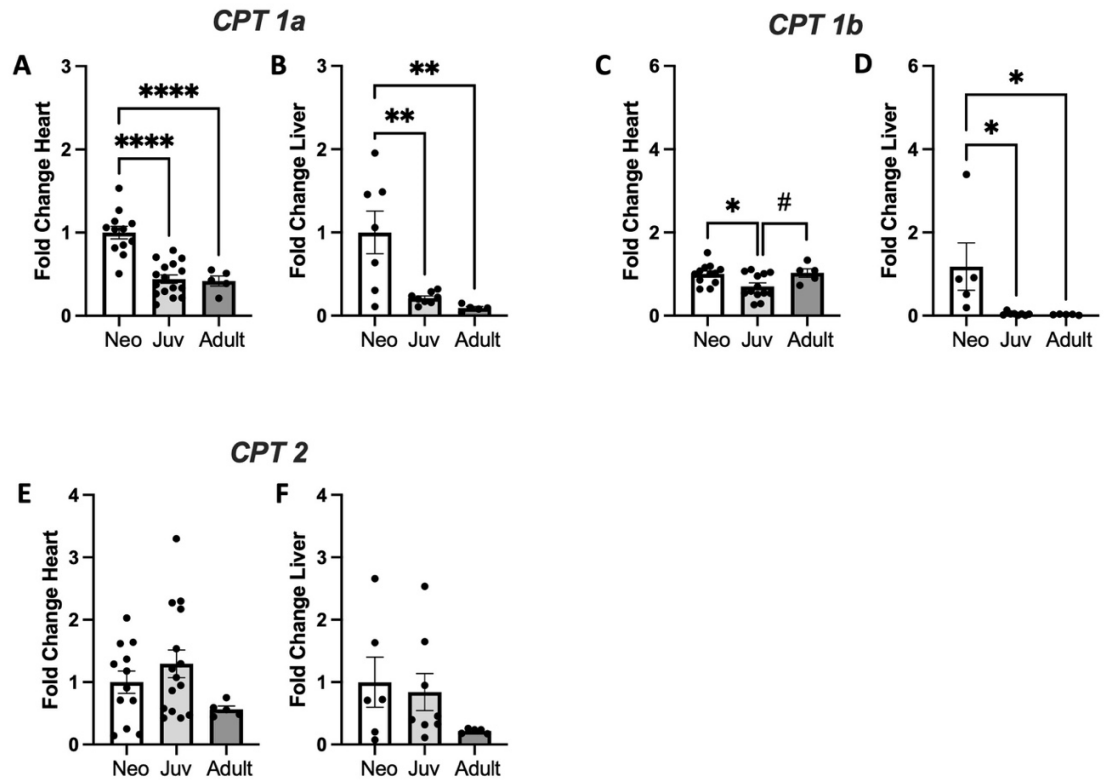

**Figure S2.** Carnitinepalmitoyltransferase (CPT) genes in heart and liver during early development. Quantitative rtPCR for the heart and liver genes: CPT1a, codes for the liver isoform of CPT I (A,B); CPT1b, codes for the muscle isoform of CPT I (C,D); CPT2, codes for CPT II (E,F). # $p < 0.1$ , \* $p < 0.05$ , \*\* $p < 0.01$ , \*\*\*\* $p < 0.0001$ ; N=5-16 separate animals. Error bars represent standard error of the mean.

**Table S1: Sequences Used for rt-qPCR Studies**

| Target   | Accession Number | Forward (5' to 3')      | Reverse (5' to 3')       |
|----------|------------------|-------------------------|--------------------------|
| CRLS1    | NM_001014258.1   | GTGGGAAGTGTAAGGGATACA   | GTAAGTGAAGAGGCTGGAACTAC  |
| HADHA    | NM_130826.2      | CAAGGTTTGTGAATGAGGCAG   | ACCATACAGATCCACAAAGCG    |
| HADHB    | NM_133618.3      | CGCCTGTCCTTACTCACTAAA   | CCATTCGAGAAACAGCAAAGG    |
| TAFAZZIN | NM_001025748.1   | GACTCCTAATTCCTGCTGGATAC | AGTGTAAGGGACAGCCAAAG     |
| ACADL    | NM_012819.2      | GAAGTGATTCCCTACCACGAAG  | CGCCATGTTTCTCTGCAATG     |
| MCAD     | NM_016986.2      | CGCCCCAGACTACGATAAAAG   | CACGCATCAAAAGTTCCCAG     |
| PDHA1    | NM_001004072.2   | CTACAGACTTACCGCTACCATG  | GCTGTTCAACATTCTATCCTTGAG |
| CD36     | NM_031561.2      | TACCTGTGAGTTGGCAAGAAG   | CACCAATAACGGCTCCAGTAA    |
| SLC27A1  | NM_053580.2      | GATGTGCTCTATGACTGCCTAC  | CACCGTTAACCCGTAGATGATAC  |
| SLC25A20 | NM_053965.2      | GTTGACTGAAGGCCCTACTTAC  | CTGGGTTAGCTGGTTGAGAATAG  |
| SLC2A1   | NM_138827.2      | CCCTGCAGTTCGGCTATAAC    | GAGTGTGGTGAGTGTGGTG      |
| CPT1a    | NM_031559.2      | CAGTGAGGACCTAAAGCAGAG   | GGTGACGGTGAAGTGGAAAG     |
| CPT1b    | NM_013200.2      | AGGCAGTAGCTTTCCAGTTC    | CACACCCCTAAGGATACCATTG   |
| CPT2     | NM_012930.1      | CATGCACTACCAGGACAGC     | CCAACGCCAGTCTCAAAATTC    |
| 18s      | NR_046237.2      | GCCGCTAGAGGTGAAATTCTTG  | CTTTCGCTCTGGTCCGTCTT     |
